# Supplementary material
Source: Springer Nature journal article supplement (https://www.springermedizin.de/resource/supplementary/12911_2011_427_MOESM2_ESM.pdf/9525714)
Supplement: MOESM2 [file 9525714]

**SOURCE: Exemple of observation with 1 phrase**

Patient presents with flu syndrome, severe onset of symptoms, fever over 39C°, *aches* and dry *cgh*, asthenia, **no** sore throat

Terms not recognized by the ECMT are

- synonym not processed by the ECMT (*Italic*)

- Abbreviation (*Underlined italic*)

Negation (**Bold**)

**STEPS OF TEXT PROCESSING**

**1. PHRASE DIVIDED INTO SYNTAGMAS**

Patient presents with flu syndrome, severe onset of symptoms, fever over 39C°, *aches* and dry *cgh*, asthenia, **no** sore throat

- 2. NEGATIONS SOUGHT** (“no sore throat” syntagma deleted)
- 3. SPELLING AND ABBREVIATION REPLACED**
- 4. NUMERIC VALUES REMOVED** (39°C)

Patient presents with flu syndrome, severe onset of symptoms, fever over C°, *myalgia* and dry *cough*, asthenia,

**5. PHRASE RE-CONCATENATED**

Patient presents with flu syndrome, severe onset of symptoms, fever over C°, *myalgia* and dry *cough*, asthenia,

**6. RE-CONCATENATED PHRASE SENT TO THE ECMT**

**7. OBSERVATION PROCESSED IN URGINDEX AFTER RETRIEVING ECMT STANDARDIZED CODES AND LABELS AND FILTERING SUSPECTED INFECTION CODES**

“Observations” table :

SNO / DE-30110 / flu-like syndrome; DRC / 10781\_CRI / + - severe onset; SNO / F-03003 / fever; DRC / 11355\_CRI / + - fever; CIP / A03 / fever; MSH / D005334 / fever; ICD / M79.1 / myalgia; ICD / R05 / cough; SNO / F-24100 / cough; SNO / F-24116 / dry cough; DRC / 12619\_CRI / + - dry; DRC / 12909\_CRI / + - dry cough; DRC / 12905\_CRI / ++++ cough; DRC / 758 / cough; CIP / R05 / cough; MSH / D003371 / cough; SNO / F-01380 / asthenia; DRC / 10326\_CRI / + - asthenia; MSH / D001247 / asthenia
